# Supplementary material for: In situ synthesis of ordered mesoporous Co-doped TiO2 and its enhanced photocatalytic activity and selectivity for the reduction of CO2
Source: Royal Society of Chemistry journal article supplement (doi:10.1039/c4ta05892e), 2015-01-01
Supplement: c4ta05892e1.pdf [file c4ta05892e1.pdf]

## Supporting Information

# In situ synthesis of ordered mesoporous Co-doped TiO<sub>2</sub> and their enhanced photocatalytic activities and selectivities in reduction of CO<sub>2</sub>

*Tao Wang<sup>1</sup>, Xianguang Meng<sup>1,2</sup>, Guigao Liu<sup>1,2</sup>, Kun Chang<sup>1</sup>, Peng Li<sup>1</sup>, Qing Kang<sup>1</sup>,  
Lequan Liu<sup>1,3,4</sup>, Mu Li<sup>1,2</sup>, Shuxin Ouyang<sup>3,4</sup>, and Jinhua Ye<sup>1,2,3,4\*</sup>*

<sup>1</sup>International Center for Materials Nanoarchitectonics (WPI-MANA), and Environmental Remediation Materials Unit, National Institute for Materials Science (NIMS), 1-1 Namiki, Tsukuba, Ibaraki, 305-0044, Japan

<sup>2</sup>Graduate School of Chemical Science and Engineering, Hokkaido University, Sapporo, 060-0814, Japan

<sup>3</sup>TU-NIMS Joint Research Center, School of Materials Science and Engineering, Tianjin University, 92 Weijin Road, Tianjin, 300072, P.R. China

<sup>4</sup>Collaborative Innovation Center of Chemical Science and Engineering (Tianjin), Tianjin, 300072, P.R. China.

\* To whom correspondence should be addressed: E-mail: [Jinhua.YE@nims.go.jp](mailto:Jinhua.YE@nims.go.jp)

## **Additional experimental section:**

### **1 Synthesis of reference samples**

For purposes of comparison in the same reactor system, we synthesize or buy some typical semiconductors or composites, including Degussa P-25, N-doped TiO<sub>2</sub>, Au/TiO<sub>2</sub>, C<sub>3</sub>N<sub>4</sub>, WO<sub>3</sub>). The performance and characteristics of these materials are shown in Fig. S8 and Table S2. Degussa P-25(TiO<sub>2</sub>) was bought from Evonik-Degussa; ST-01(TiO<sub>2</sub>) and WO<sub>3</sub> were bought from Wako pure chemical industries.

Synthesis of N-doped TiO<sub>2</sub>: in a typical preparation, a certain amount of ST-01 was annealed in a tubular furnace at 550 °C for 2 h under NH<sub>3</sub> atmosphere. The sample was named as N-TiO<sub>2</sub>.

Synthesis of Au/TiO<sub>2</sub>: in a typical preparation, ordered mesoporous TiO<sub>2</sub> (OMT) powder was immersed into a certain amount of HAuCl<sub>4</sub> aqueous solution. Then, a small amount of ascorbic acid aqueous solution was added to reduce Au. The theoretical weight percentage of Au is about 7%. The sample was named as Au-OMT.

Synthesis of bulk g-C<sub>3</sub>N<sub>4</sub>: in a typical preparation,<sup>R1</sup> a certain amount of dicyandiamide was annealed in a tubular furnace at 550 °C for 4 h under air atmosphere.

## 2 Calculation of the quantum efficiency

On the basis of the assumption that a photon must be effectively absorbed, the photocatalytic quantum efficiency (QE) is typically defined as the ratio of the rate of photocatalytic events to the absorbed photons.<sup>R2,R3</sup>

$$QE = \frac{N_{\text{photocat. events}}}{N_{\text{absorbed photons}}}$$

The photocatalytic events have to be summed over the (molar) amounts of all the products,  $N_{\text{photocat. events}} = \sum_i n_i M_i$ , Where  $n_i$  is the number of electrons required to obtain one molecule of product  $M_i$ .

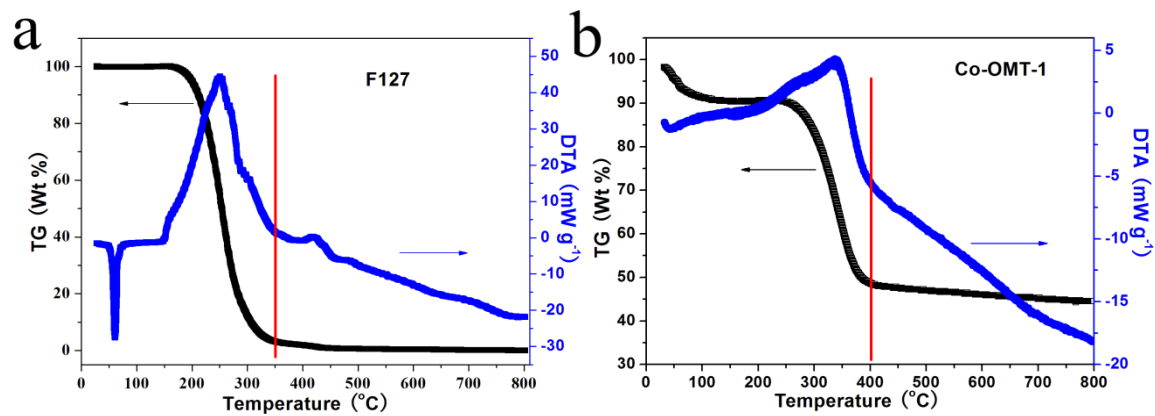

**Fig. S1** TG/DTA curves of F127 (a) recorded in N<sub>2</sub> and Co-OMT-1 (b) recorded in air

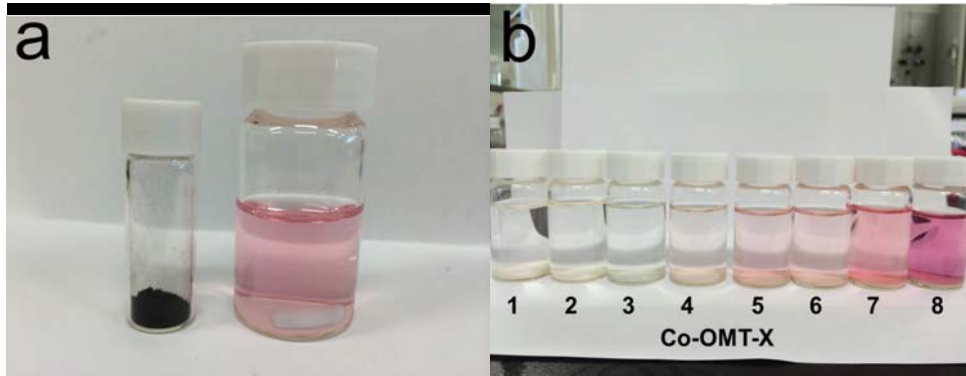

**Fig. S2** (a) The photo of of  $\text{Co}_3\text{O}_4$  before and after dissolving by HCl. (b) The photos of Co-doped  $\text{TiO}_2$  dissolving by HCl to remove the  $\text{Co}_3\text{O}_4$ .

**Table S1** The molar ratio of samples before and after removing the  $\text{Co}_3\text{O}_4$ .

| Sample                  | Theoretical molar ratio<br>(Co: Ti) <sup>[a]</sup> | Practical molar ratio<br>(Co: Ti) <sup>[b]</sup> | Doping levels of $\text{Co}^{2+}$<br>(Co: Ti) <sup>[c]</sup> |
|-------------------------|----------------------------------------------------|--------------------------------------------------|--------------------------------------------------------------|
| OMT                     | 0                                                  | 0                                                | 0                                                            |
| Co-OMT-1                | 0.002                                              | 0.0023                                           | 0.0020                                                       |
| Co-OMT-2                | 0.005                                              | 0.0049                                           | 0.0021                                                       |
| Co-OMT-3                | 0.01                                               | 0.013                                            | 0.0040                                                       |
| Co-OMT-4                | 0.025                                              | 0.026                                            | 0.0041                                                       |
| Co-OMT-5                | 0.05                                               | 0.053                                            | 0.0049                                                       |
| Co-OMT-6                | 0.1                                                | 0.12                                             | 0.0063                                                       |
| Co-OMT-7                | 0.15                                               | 0.15                                             | 0.0064                                                       |
| Co-OMT-8                | 0.2                                                | 0.25                                             | 0.0045                                                       |
| $\text{Co}_3\text{O}_4$ | -                                                  | -                                                | -                                                            |

[a] The value is calculated according to the additive amount in the synthetic process.

[b] The value is calculated according to the EDX analysis before removing the  $\text{Co}_3\text{O}_4$ .

[c] The value is calculated according to the EDX analysis after removing the  $\text{Co}_3\text{O}_4$ .

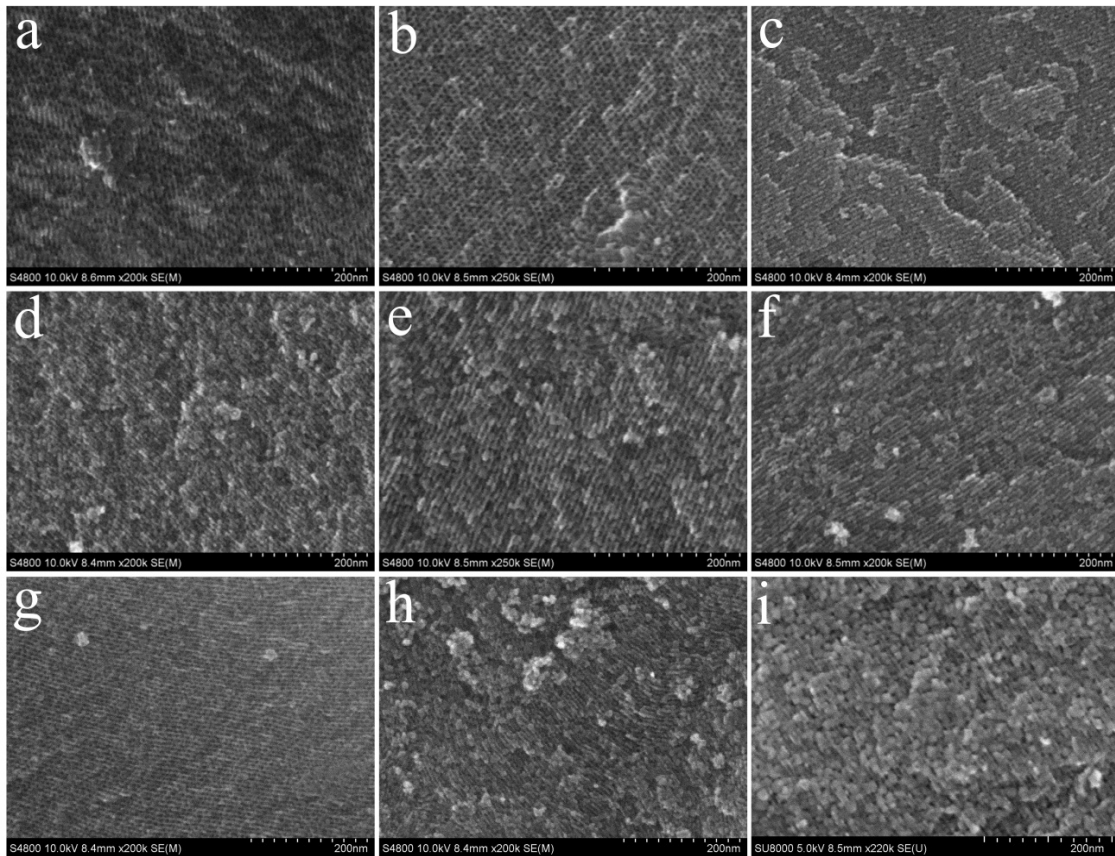

**Fig. S3** FE-SEM images of samples: (a) OMT, (b) Co-OMT-1, (c) Co-OMT-2, (d) Co-OMT-3, (e) Co-OMT-4, (f) Co-OMT-5, (g) Co-OMT-6, (h) Co-OMT-7, (i) Co-OMT-8.

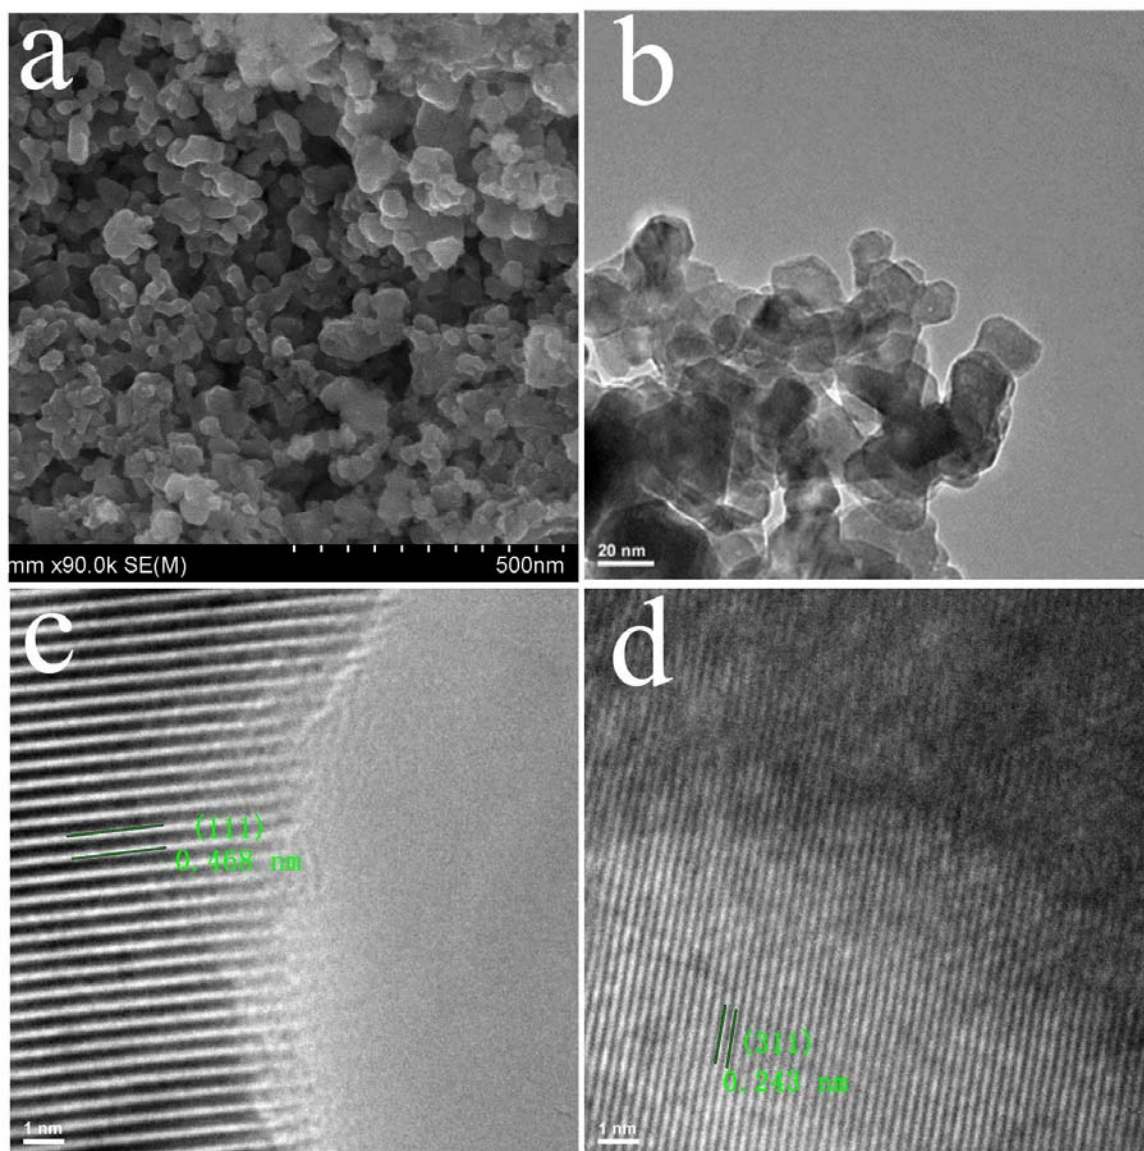

**Fig. S4** (a) FE-SEM and (b,c,d) TEM images of  $\text{Co}_3\text{O}_4$ .

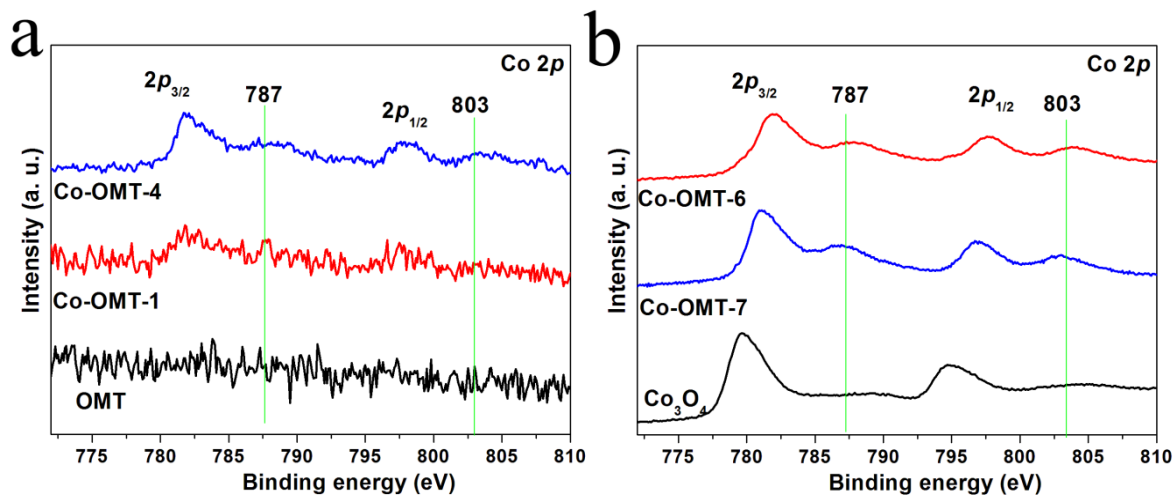

Fig. S5 X-ray photoelectron spectroscopy of samples.



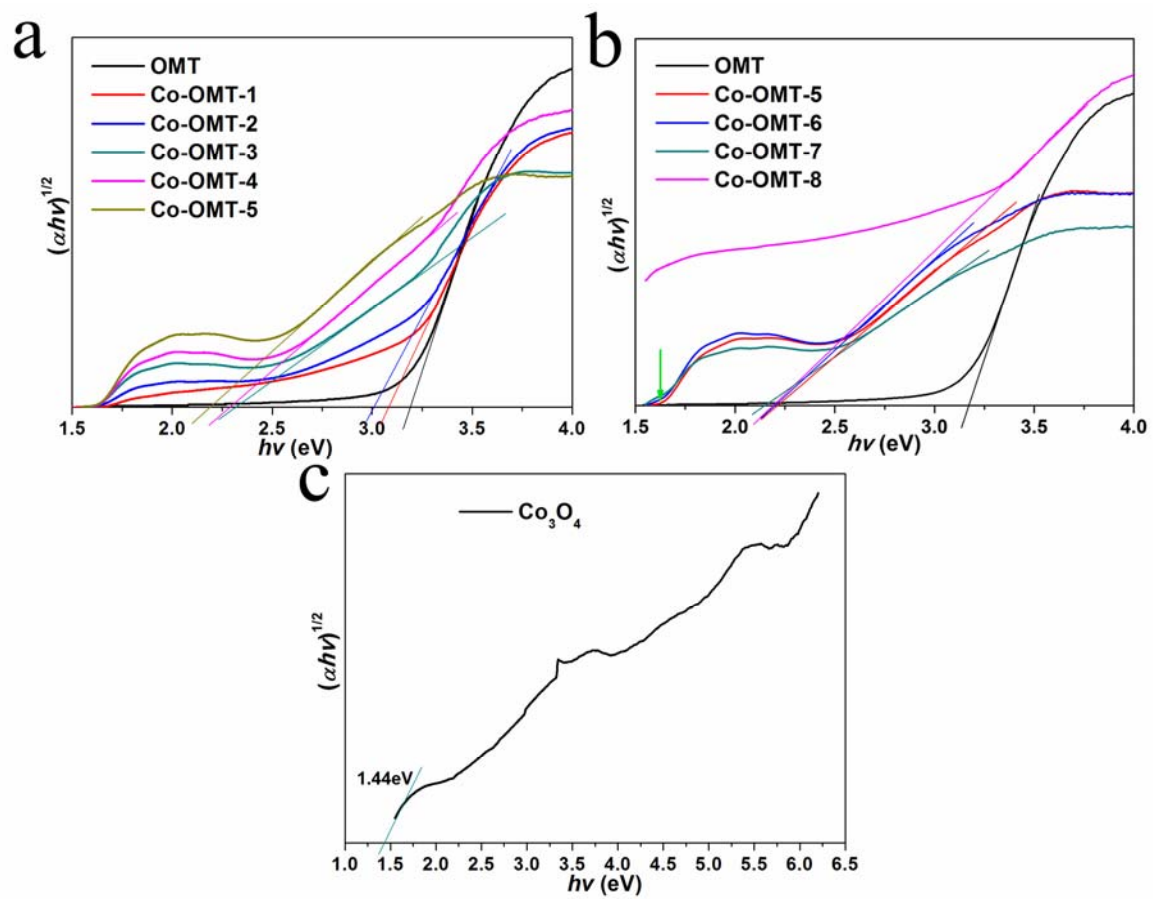

**Fig. S6** The Tauc plots of samples.

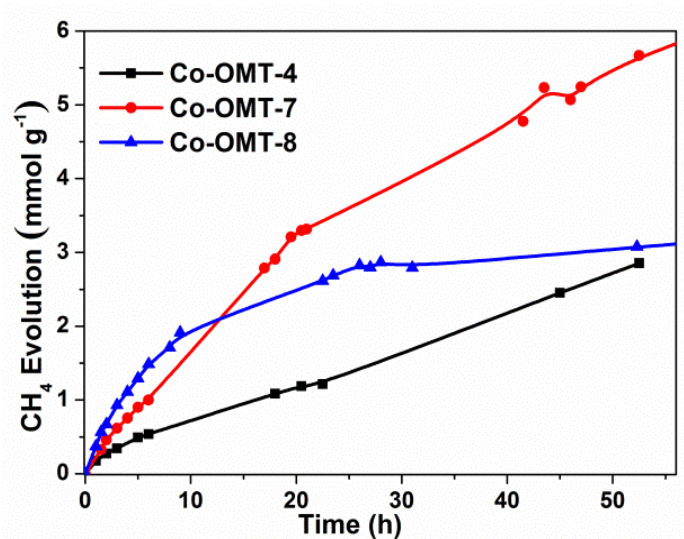

**Fig. S7** CH<sub>4</sub> evolution over Co-OMT-4, Co-OMT-7 and Co-OMT-8 under visible light.

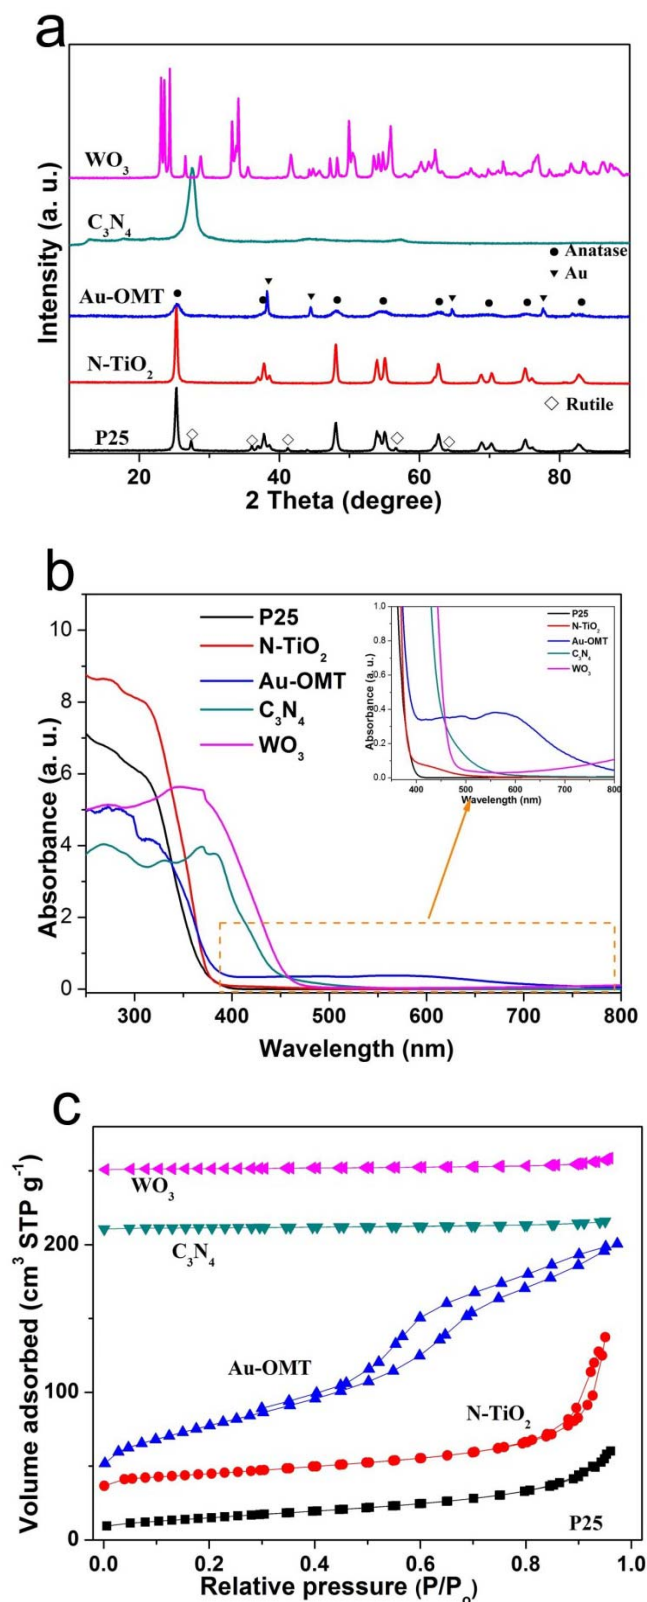

**Fig. S8** (a) Wide-angle XRD patterns, (b) UV-vis absorption spectra and (c) N<sub>2</sub> adsorption-desorption isotherms of samples.

The wide-angle XRD patterns of samples were shown in Fig. S8a. We can see that P25 presents a mixture of anatase and rutile; N-TiO<sub>2</sub> presents anatase; Au-OMT

presents a mixture of anatase and gold. The characteristic peaks of C<sub>3</sub>N<sub>4</sub> are same as the previous reports.<sup>R1</sup> UV-visible absorption spectra (Fig. S8b) show that all samples except P25, possess the optical absorption capability in the visible light region. The specific surface areas of P25, N-TiO<sub>2</sub>, Au-OMT, C<sub>3</sub>N<sub>4</sub>, WO<sub>3</sub> were 54.4, 53.6, 181.0, 5.2, 5.4 m<sup>2</sup> g<sup>-1</sup>, respectively (calculated by the BET method from N<sub>2</sub> adsorption-desorption isotherms in Figure S8c).

**Table S2** Summary of the various photocatalytic systems employed for CO<sub>2</sub> reduction.

| Catalyst                                                     | Co-catalyst | Light source                                                                 | Conditions                                 | Major products        | R <sub>max</sub> <sup>[a]</sup> | Ref.       |
|--------------------------------------------------------------|-------------|------------------------------------------------------------------------------|--------------------------------------------|-----------------------|---------------------------------|------------|
| Co-OMT-4                                                     | -           | Visible light: 300 W Xe lamp with a cut-off filter ( $\lambda > 420$ nm)     | CO <sub>2</sub> and H <sub>2</sub> O vapor | CH <sub>4</sub><br>CO | 0.09<br>1.94                    | This study |
|                                                              |             | UV-Vis light: 300 W Xe lamp                                                  | CO <sub>2</sub> and H <sub>2</sub> O vapor | CH <sub>4</sub><br>CO | 0.33<br>2.09                    | This study |
| P25                                                          | -           | Visible light: 300 W Xe lamp with a cut-off filter ( $\lambda > 420$ nm)     | CO <sub>2</sub> and H <sub>2</sub> O vapor | None                  | 0                               | This study |
| N-TiO <sub>2</sub>                                           | -           | Visible light: 300 W Xe lamp with a cut-off filter ( $\lambda > 420$ nm)     | CO <sub>2</sub> and H <sub>2</sub> O vapor | CH <sub>4</sub><br>CO | 0.015<br>0.153                  | This study |
| Au-OMT                                                       | -           | Visible light: 300 W Xe lamp with a cut-off filter ( $\lambda > 420$ nm)     | CO <sub>2</sub> and H <sub>2</sub> O vapor | CH <sub>4</sub><br>CO | 0.018<br>0.056                  | This study |
| C <sub>3</sub> N <sub>4</sub>                                | -           | Visible light: 300 W Xe lamp with a cut-off filter ( $\lambda > 420$ nm)     | CO <sub>2</sub> and H <sub>2</sub> O vapor | CH <sub>4</sub><br>CO | 0.031<br>0.135                  | This study |
| WO <sub>3</sub>                                              | -           | Visible light: 300 W Xe lamp with a cut-off filter ( $\lambda > 420$ nm)     | CO <sub>2</sub> and H <sub>2</sub> O vapor | CH <sub>4</sub><br>CO | 0.005<br>0.017                  | This study |
| ZnAl <sub>2</sub> O <sub>4</sub> -modified mesoporous ZnGaNO | 0.5 wt% Pt  | Visible light: 300 W Xe lamp with a cut-off filter ( $\lambda > 420$ nm)     | CO <sub>2</sub> and H <sub>2</sub> O vapor | CH <sub>4</sub>       | 0.0092                          | R4         |
| RGO–CdS nanorod composite                                    | -           | Visible light: 300 W Xe arc lamp with a cut-off filter ( $\lambda > 420$ nm) | CO <sub>2</sub> and H <sub>2</sub> O vapor | CH <sub>4</sub>       | 2.51                            | R5         |
| P25                                                          | -           | UV-Vis light: 300 W Xe lamp                                                  | CO <sub>2</sub> and H <sub>2</sub> O vapor | CH <sub>4</sub>       | 0.0027                          | R6         |
| Ordered                                                      | -           | UV-Vis light: 300 W                                                          | CO <sub>2</sub> and H <sub>2</sub> O       | CH <sub>4</sub>       | 0.19                            | R6         |

|                                                                         |                                             |                                                                                                                             |                                                                                                                     |                       |                       |     |
|-------------------------------------------------------------------------|---------------------------------------------|-----------------------------------------------------------------------------------------------------------------------------|---------------------------------------------------------------------------------------------------------------------|-----------------------|-----------------------|-----|
| mesoporous TiO <sub>2</sub>                                             |                                             | Xe lamp                                                                                                                     | vapor                                                                                                               | CO                    | 0.15                  |     |
| Zn <sub>2</sub> GeO <sub>4</sub> nanobelt                               | 1 wt % Pt<br>and 1 wt %<br>RuO <sub>2</sub> | <b>UV-Vis light:</b> 300 W<br>Xe lamp                                                                                       | CO <sub>2</sub> and H <sub>2</sub> O<br>vapor                                                                       | CH <sub>4</sub>       | 0.025                 | R7  |
| Anatase TiO <sub>2</sub> rods<br>with {010} facets                      | 1 wt% Pt                                    | <b>UV-Vis light:</b> 300 W<br>Xe lamp                                                                                       | CO <sub>2</sub> and H <sub>2</sub> O<br>vapor                                                                       | CH <sub>4</sub>       | 0.0057                | R8  |
| Hollow anatase<br>TiO <sub>2</sub> single crystals<br>with {101} facets | 1 wt% RuO <sub>2</sub>                      | <b>UV-Vis light:</b> 300 W<br>Xe lamp                                                                                       | CO <sub>2</sub> and H <sub>2</sub> O<br>vapor                                                                       | CH <sub>4</sub>       | 0.0017                | R9  |
| Leaf-architected<br>SrTiO <sub>3</sub>                                  | 1 wt % Au                                   | <b>UV-Vis light:</b> 300 W<br>Xe arc lamp                                                                                   | CO <sub>2</sub> and H <sub>2</sub> O<br>vapor                                                                       | CH <sub>4</sub><br>CO | 0.28<br>0.35          | R10 |
| NaTaO <sub>3</sub>                                                      | 1 wt % Au                                   | <b>UV-Vis light:</b> 200 W<br>Hg-Xe arc lamp                                                                                | CO <sub>2</sub> and H <sub>2</sub> O<br>vapor                                                                       | CH <sub>4</sub><br>CO | 0.036<br>0.17         | R11 |
| TiO <sub>2</sub> nanorod                                                | Ag                                          | <b>UV light:</b> four 8 W<br>UVA lamps with a<br>wavelength of 365 nm                                                       | CO <sub>2</sub> and H <sub>2</sub> O<br>vapor                                                                       | CH <sub>4</sub>       | 2.64                  | R12 |
| Brookite TiO <sub>2</sub><br>nanorods                                   | 0.05 wt%<br>Au                              | <b>UV light:</b> a<br>light-emitting diode<br>(Nichia, NCCU033),<br>which emitted light at a<br>wavelength of ca. 365<br>nm | 5 mL of 0.2<br>mol L <sup>-1</sup><br>KHCO <sub>3</sub><br>aqueous<br>solution<br>saturated with<br>CO <sub>2</sub> | CH <sub>3</sub> OH    | 0.11                  | R13 |
| In-doped TiO <sub>2</sub>                                               | -                                           | <b>UV-vis light:</b> 500W<br>mercury (Hg) flash<br>lamp                                                                     | CO <sub>2</sub> and H <sub>2</sub> O<br>vapor, 0.20<br>bars reactor<br>pressure,<br>373K reaction<br>temperature    | CH <sub>4</sub><br>CO | 243.75<br>81.25       | R14 |
| MgO/TiO <sub>2</sub><br>nanotube film                                   | Pt                                          | <b>UV-vis light:</b> 300W<br>high pressure Hg lamp                                                                          | 0.1 mol L <sup>-1</sup><br>KHCO <sub>3</sub><br>solution                                                            | CH <sub>4</sub>       | 100.22 <sup>[b]</sup> | R15 |

[a] Maximum formation rate reported for the major product(s), in  $\mu\text{mol g}^{-1}\text{h}^{-1}$ .

[b] In ppm h<sup>-1</sup> cm<sup>-1</sup>.

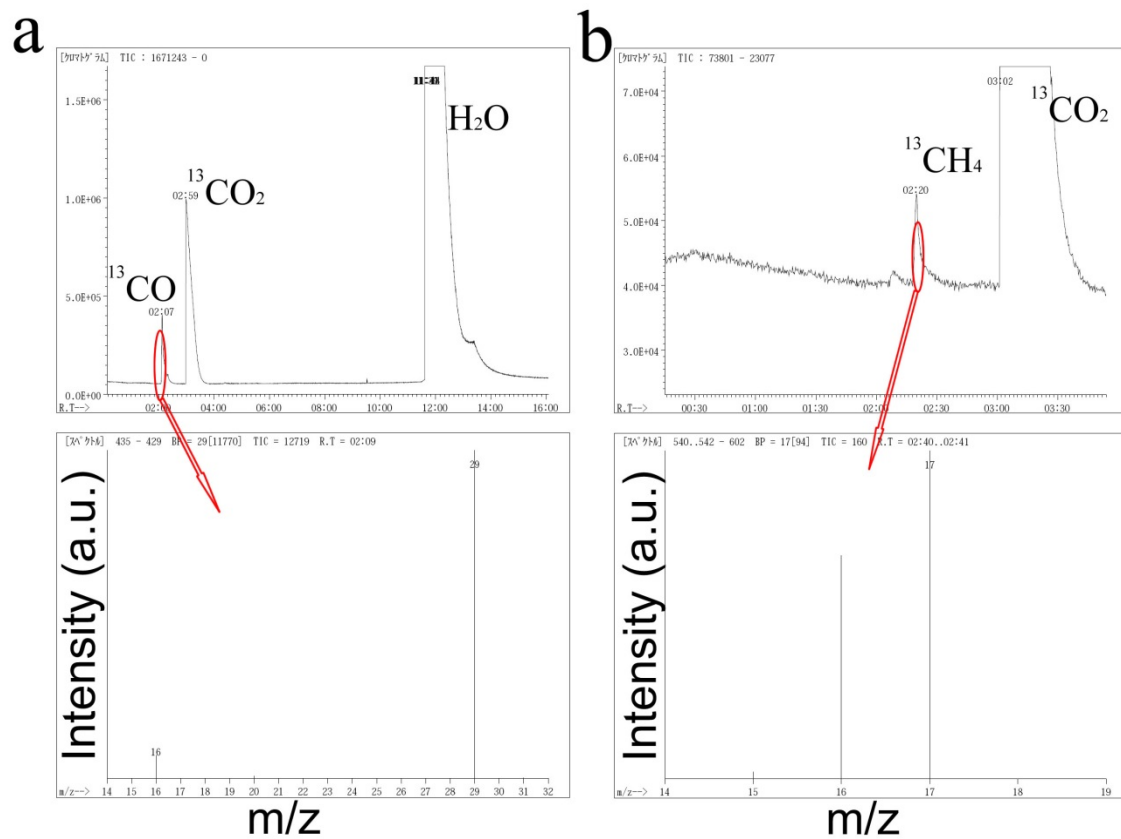

**Fig. S9** GC-MS spectra of the products of photocatalytic  $^{13}\text{CO}_2$  reduction over (a) Co-OMT-4 and (b) Co-OMT-7 after 12 h irradiation.

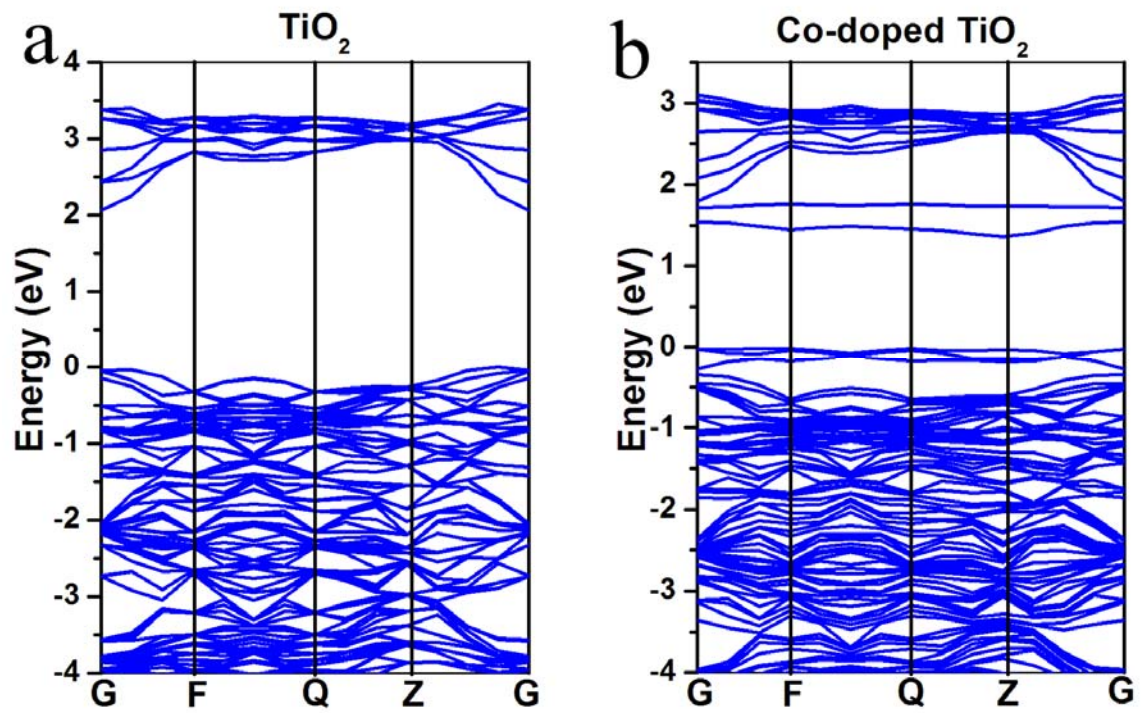

**Fig. S10** Electronic structures of (a) anatase  $\text{TiO}_2$  and (b)  $\text{Co}_x\text{Ti}_{1-x}\text{O}_2$  ( $x=0.0625$ ).

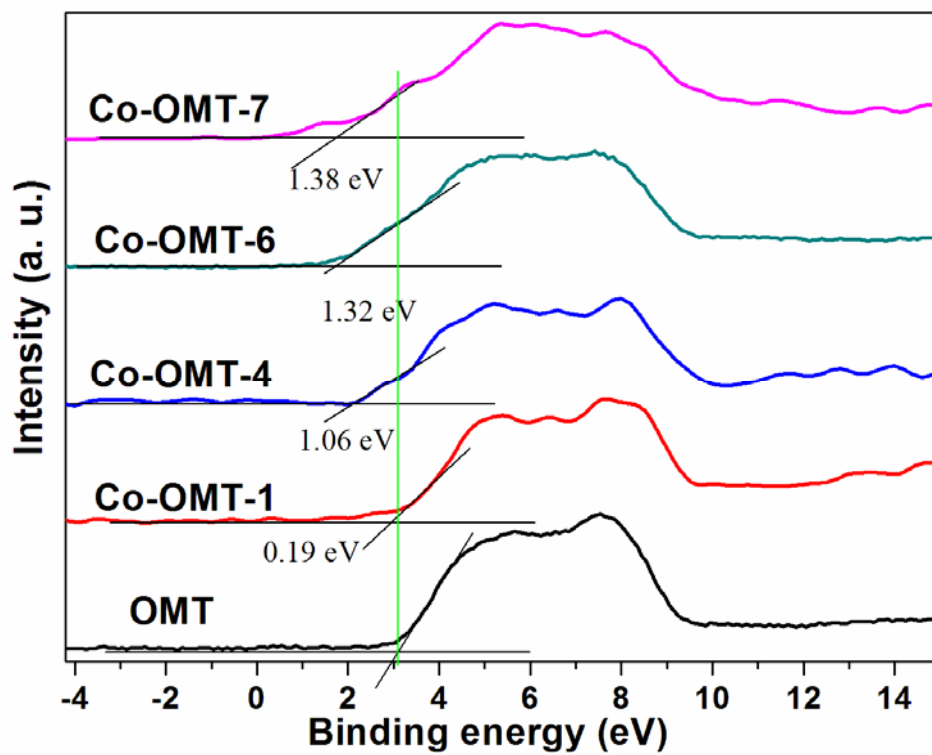

**Fig. S11** Valence band XPS spectra of samples. The values in Fig. are the relative difference between the Co-OMT-x and OMT.



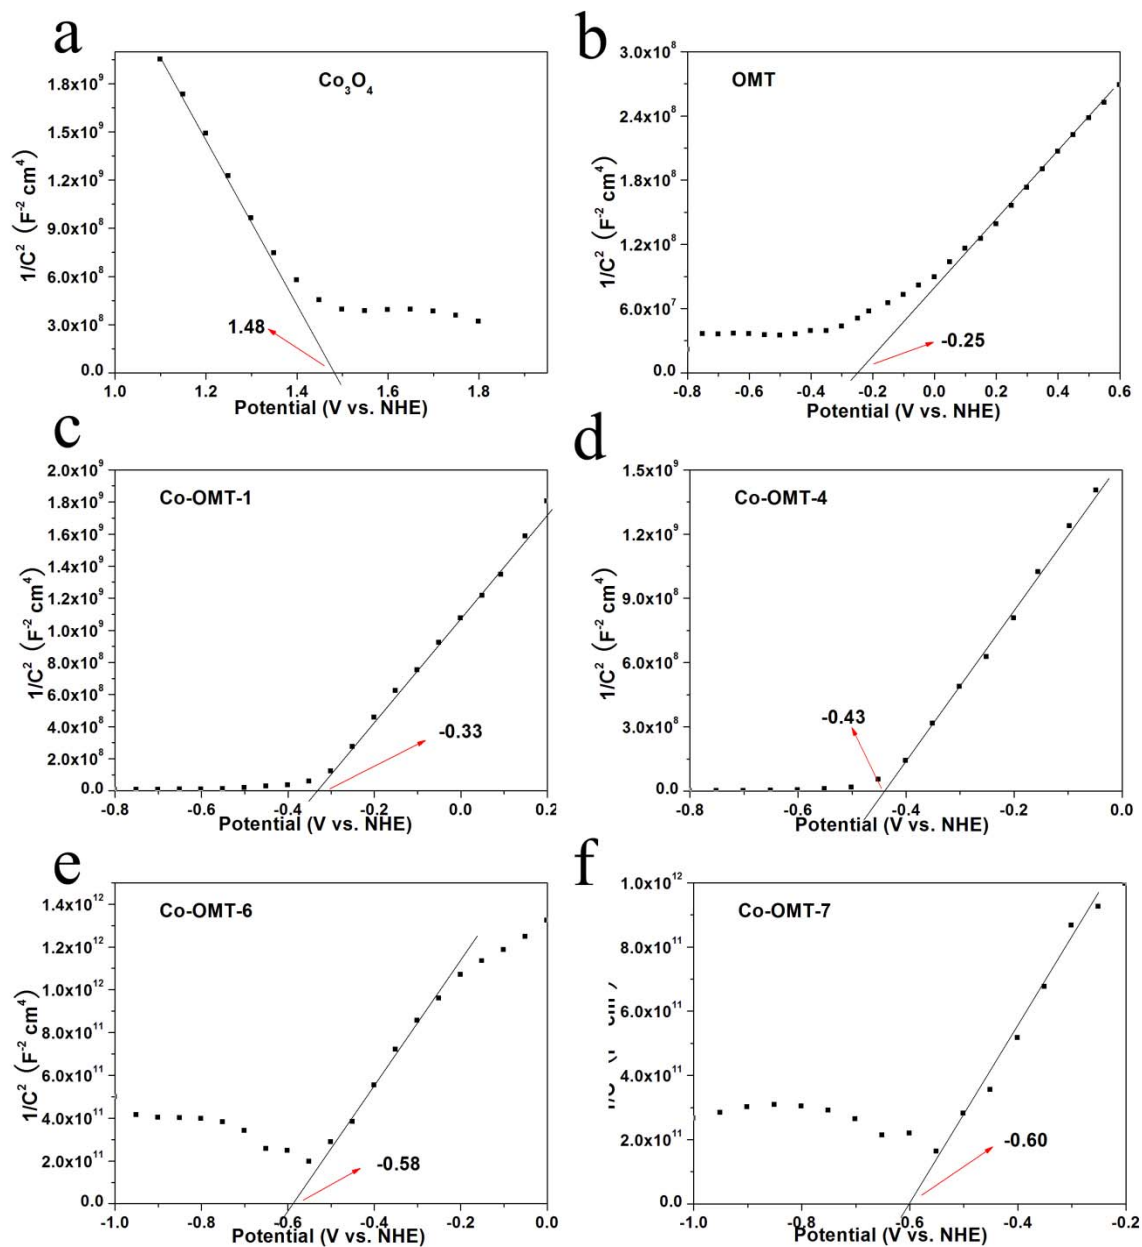

**Fig. S12** Mott-Schottky plots of samples: (a) OMT, (b) OMT, (c) Co-OMT-1, (d) Co-OMT-4, (e) Co-OMT-6, (f) Co-OMT-7.

## References

- R1. X. C. Wang , K. Maeda , A. Thomas , K. Takanabe , G. Xin , J. M. Carlsson , K. Domen, M. Antonietti, *Nat. Mater.*, 2009, **8**, 76–80.
- R2. S. E. Braslavsky, A. M. Braun, A. E. Cassano, A. V. Emeline, M. I. Litter, L. Palmisano, V. N. Parmon, N. Serpone, *Pure Appl. Chem.*, 2011, **83**, 931–1014.
- R3. S. N. Habisreutinger, L. Schmidt-Mende, J. K. Stolarczyk, *Angew. Chem. Int. Ed.*, 2013, **52**, 7372–7408.
- R4. S. Yan, H. Yu, N. Wang, Z. Li and Z. Zou, *Chem. Commun.*, 2012, **48**, 1048–1050.
- R5. J. Yu, J. Jin, B. Cheng and M. Jaroniec, *J. Mater. Chem. A*, 2014, **2**, 3407–3416.
- R6. T. Wang, X. Meng, P. Li, S. Ouyang, K. Chang, G. Liu, Z. Mei and J. Ye, *Nano Energy*, 2014, **9**, 50–60.
- R7. Q. Liu, Y. Zhou, J. Kou, X. Chen, Z. Tian, J. Gao, S. Yan and Z. G. Zou, *J. Am. Chem. Soc.*, 2010, **132**, 14385–14387.
- R8. J. Pan, X. Wu, L. Wang, G. Liu, G. Q. Lu and H. M. Cheng, *Chem. Commun.*, 2011, **47**, 8361–8363.
- R9. W. Jiao, L. Wang, G. Liu, G. Q. Lu and H. M. Cheng, *ACS Catal.*, 2012, **2**, 1854–1859.
- R10. H. Zhou, J. Guo, P. Li, T. X. Fan, D. Zhang and J. H. Ye, *Sci. Rep.*, 2013, **3**, 1667.
- R11. H. Zhou, P. Li, J. Guo, R. Yan, T. Fan, D. Zhang and J. Ye. *Nanoscales*, 2015, **7**, 113–120.
- R12. D. Kong, J. Ziang Y. Tan, F. Yang, J. Zeng and X. Zhang, *Appl. Surf. Sci.*, 2013, **277**, 105–110.

- R13. T. Ohno, T. Higo, N. Murakami, H. Saito, Q. Zhang, Y. Yang and T. Tsubota, *Appl. Catal. B*, 2014, **152–153**, 309–316.
- R14. M. Tahir, and N. S. Amin, *Appl. Catal. B*, 2015, **162**, 98–109.
- R15. Q. Li, L. Zong, C. Li and J. Yang. *Appl. Surf. Sci.*, 2014, **314**, 458–463.
